# Supplementary material for: Combination of guanidinium and quaternary ammonium polymers with distinctive antimicrobial mechanisms achieving a synergistic antimicrobial effect
Source: Royal Society of Chemistry journal article supplement (doi:10.1039/d0bm00752h), 2020-01-01
Supplement: d0bm00752h1.pdf [file d0bm00752h1.pdf]

### Supplementary Information for

#### **Combination of Guanidinium and Quaternary Ammonium Polymers with Distinctive Antimicrobial Mechanisms Achieving A Synergistic Antimicrobial Effect**

Jiayu Leong<sup>a</sup>, Chuan Yang<sup>a</sup>, Jason Tan<sup>a</sup>, Bing Qian Tan<sup>a</sup>, Sherwin Hor<sup>a</sup>, James L. Hedrick<sup>b,\*\*</sup>, Yi Yan Yang<sup>a,\*</sup>

<sup>a</sup> Institute of Bioengineering and Nanotechnology, 31 Biopolis Way, Singapore 138669, Singapore

<sup>b</sup> IBM Almaden Research Center, 650 Harry Road, San Jose, CA 95120, U.S.A.

\* Corresponding author. Institute of Bioengineering and Nanotechnology, 31 Biopolis Way, Singapore 138669, Singapore. E-mail: [yyyang@ibn.a-star.edu.sg](mailto:yyyang@ibn.a-star.edu.sg)

\*\* Co-corresponding author. IBM Almaden Research Center, 650 Harry Road, San Jose, CA 95120, U.S.A. E-mail: [hedrick@us.ibm.com](mailto:hedrick@us.ibm.com)

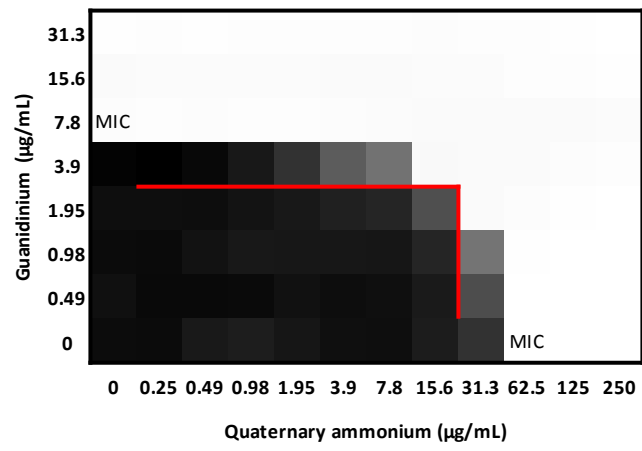

**Figure S1.** Checkerboard assay of homopolymer G\_20 and homopolymer Q\_20 against *Klebsiella pneumoniae*.
